# Supplementary material for: Using an Untargeted Metabolomics Approach to Identify Salivary Metabolites in Women with Breast Cancer
Source: MDPI journal article supplement (doi:10.3390/metabo10120506), 2020-12-10
Supplement: s1 [file s1]

**Supplemental Table 5. Patients and their treatment schedules.**

| Breast cancer cases | TNM  | T  | N  | M | Grade | Molecular subtype | Treatment                                                                 | Response |
|---------------------|------|----|----|---|-------|-------------------|---------------------------------------------------------------------------|----------|
| BC3                 | IIA  | T2 | N0 | 0 | 3     | luminal B HER2-   | NACT: AC x 4 cycles- paclitaxel                                           | CR       |
| BC9                 | IIA  | T2 | N0 | 0 | 3     | HER2+             | NACT: Docetaxel + carboplatin + trastuzumabe                              | PR       |
| BC10                | IA   | T1 | N0 | 0 | 2     | TN                | NACT: AC x 4 cycles- carboplatin and paclitaxel                           | PR       |
| BC13                | IIIB | T4 | N1 | 0 | 2     | luminal A         | NACT                                                                      | PR       |
| BC19                | IIA  | T2 | N0 | 0 | 3     | HER2+             | NACT: AC x 4 cycles- paclitaxel+ pertuzumabe + trastuzumabe<br>x 4 cycles | CR       |
| BC20                | IV   | T4 | N3 | 1 | 1     | luminal A         | Paliative tamoxifen                                                       | PR       |
| BC21                | IIA  | T2 | N0 | 0 | 3     | TN                | NACT: AC x 4 - paclitaxel                                                 | CR       |
| BC24                | IIA  | T2 | N0 | 0 | 2     | luminal B HER2 +  | NACT: AC x 4 cycles- Docetaxel + pertuzumabe +<br>trastuzumabe            | CR       |
| BC25                | IV   | T4 | N1 | 1 | 3     | HER2+             | Paliative treatment: Docetaxel + Pertuzumab+ trastuzumab 6<br>cycles      | PR       |
| BC26                | IIB  | T2 | N0 | 0 | 3     | HER2+             | NACT: AC x 4 cycles- paclitaxel+ pertuzumabe + trastuzumabe<br>x 4 cycles | CR       |

TNM: Tumor, Node Metastasis; NACT: neo-adjuvant chemotherapy, AC: doxorubicin plus cyclophosphamide, CR: complete response, PR: partial response, TN: triple negative.
