# Supplementary material for: Using an Untargeted Metabolomics Approach to Identify Salivary Metabolites in Women with Breast Cancer
Source: MDPI journal article supplement (doi:10.3390/metabo10120506), 2020-12-10
Supplement: s1 [file s1]

**Supplementary Table 1. Subjects characteristics**

| BC   | Age | Menopaus<br>e | Smoking | Hystological<br>type                 | TNM      | T   | N  | M | G | Mol<br>subtype               | ER   | PR       | Her2 | Ki67 | Metastasis<br>site    | Medication                                  |
|------|-----|---------------|---------|--------------------------------------|----------|-----|----|---|---|------------------------------|------|----------|------|------|-----------------------|---------------------------------------------|
| BC1  | 34  | no            | yes     | IDC +<br>micropapillary<br>component | IIA      | T1c | N1 | 0 | 2 | luminal A                    | 60%  | 90%      | neg  | 10%  | no                    | no                                          |
| BC2  | 42  | no            | no      |                                      | IV       | T4a | N1 | 1 | 3 | luminal B                    | 95%  | 95%      | 3+   | 60%  | node +<br>bone + lung | no                                          |
| BC3  | 51  | yes           | no      |                                      | IIA      | T2  | N0 | 0 | 3 | HER2 +<br>luminal B<br>HER2- | 0    | 10%      | neg  | 90%  |                       | Losartan,<br>Meformin,<br>Indapamide        |
| BC4  | 39  | no            | no      | IDC                                  | IIA      | T2  | N0 | 0 | 2 | luminal A                    | 80%  | 80%      | neg  | 10%  | no                    | no                                          |
| BC5  | 42  | no            | yes     | IDC                                  | IA       | T1c | N0 | 0 | 2 | luminal A                    | 90%  | 100<br>% | neg  | 20%  | no                    | no                                          |
| BC6  | 48  | no            | yes     | IDC                                  | IIA      | T2  | N0 | 0 | 1 | luminal A                    | 100% | 1%       | neg  | 3-5% | no                    | Losartan,<br>Atenolol,<br>Levothyroxi<br>ne |
| BC7  | 56  | yes           | no      | IDC                                  | IIA      | T2  | N0 | 0 | 3 | HER2+                        | 0    | 0        | 3+   | 30%  | no                    | Amlodipine,<br>Levothyroxi<br>ne            |
| BC8  | 68  | yes           | no      | IDC                                  | IA       | T1  | N0 | 0 | 2 | TN                           | 0    | 0        | neg  | 40%  | no                    | no                                          |
| BC9  | 42  | yes           | no      | IDC                                  | III<br>B | T4  | N1 | 0 | 2 | luminal B<br>HER2 +          | 70%  | 80%      | 3+   | 30%  | no                    | no                                          |
| BC10 | 37  | no            | no      | IDC                                  | IIB      | T2  | N1 | 0 | 2 | luminal A                    | 90%  | 80%      | neg  | 20%  | no                    | no                                          |
| BC11 | 56  | yes           | yes     | IDC                                  | III<br>B | T4  | N1 | 0 | 2 | luminal A                    | 95%  | 80%      | neg  | 20%  | no                    | no                                          |
| BC12 | 35  | no            | no      | IDC                                  | IIA      | T2  | N0 | 0 | 2 | luminal B<br>HER2-           | 100% | 90%      | neg  | 50%  | no                    | no                                          |
| BC13 | 53  | yes           | no      | IDC                                  | III<br>B | T4b | N1 | 0 | 2 | luminal B<br>HER2 +          | 100% | 90%      | 3+   | 40%  | no                    | no                                          |
| BC14 | 47  | no            | no      | IDC                                  | IIB      | T2  | N1 | 0 | 2 | HER2+                        | neg  | neg      | 3+   | 10%  | no                    | Amlodipine,<br>Hidrocloroti<br>azide        |
| BC15 | 71  | yes           | no      | IDC                                  | IV       | T3  | N0 | 1 | 2 | luminal B<br>HER2 +          | 90%  | 90%      | 3+   | 50%  | lung                  | no                                          |
| BC16 | 55  | no            | no      | IDC                                  | IIA      | T2  | N0 | 0 | 3 | HER2+                        | neg  | neg      | 3+   | 50%  | no                    | Captopril                                   |
| BC17 | 51  | yes           | no      | IDC                                  | IV       | T4  | N3 | 1 | 1 | luminal A                    | 70%  | 10%      | neg  | 20%  | bone                  | Atenolol                                    |

|      |    |     |    |                                      |          |     |    |   |   |                     |     |     |     |     |      |          |
|------|----|-----|----|--------------------------------------|----------|-----|----|---|---|---------------------|-----|-----|-----|-----|------|----------|
| BC18 | 37 | no  | no | IDC                                  | IIA      | T2  | N0 | 0 | 3 | TN                  | neg | neg | neg | 80% | no   | no       |
| BC19 | 51 | no  | no | IDC                                  | III<br>B | T4  | N0 | 0 | 2 | luminal B<br>HER2 + | 70% | neg | 3+  | 25% | no   | Atenolol |
| BC20 | 53 | yes | no | IDC                                  | III<br>C | T4d | N3 | 0 | 3 | TN                  | neg | neg | neg | 30% | no   | no       |
| BC21 | 39 | no  | no | IDC                                  | IIA      | T2  | N0 | 0 | 2 | luminal B<br>HER2 + | 95% | 97% | 3+  | 45% | no   | no       |
| BC22 | 42 | no  | no | IDC                                  | IV       | T4  | N1 | 1 | 3 | HER2+               | neg | neg | 3+  | 70% | bone | no       |
| BC23 | 44 | no  | no | IDC +<br>squamous<br>differentiation | IIB      | T2  | N0 | 0 | 3 | HER2+               | neg | neg | 3+  | 50% | no   | no       |

BC: breast cancer cases , IDC: invasive ductal carcinoma, TNM: tumor node metastasis stage, T: tumor, N: node, M: metastasis, G: tumor grade ; Mol: molecular, ER: estrogen receptor status, PR: Progesterone receptor status., HER2: human epidermal growth factor receptor 2, neg: negative; Ki 67: proliferation index.

| HC   | Age | Menopause | Smoking | Childbearing | Medication                                   |
|------|-----|-----------|---------|--------------|----------------------------------------------|
| HC1  | 28  | no        | no      | 0            | Drospirenone, Etinilestradiol,<br>Omeprazole |
| HC2  | 24  | no        | no      | 0            | Mebeverine                                   |
| HC3  | 35  | no        | no      | 1            | no                                           |
| HC4  | 29  | no        | no      | 0            | no                                           |
| HC5  | 26  | no        | no      | 0            | Drospirenone, Etinilestradiol,               |
| HC6  | 26  | no        | no      | 0            | Drospirenone, Etinilestradiol,               |
| HC7  | 22  | no        | no      | 0            | no                                           |
| HC8  | 25  | no        | yes     | 0            | no                                           |
| HC9  | 44  | no        | no      | 0            | no                                           |
| HC10 | 31  | no        | no      | 2            | no                                           |
| HC11 | 50  | yes       | no      | 0            | Omeprazole                                   |
| HC12 | 31  | no        | no      | 2            | Levothyroxine                                |
| HC13 | 47  | no        | no      | 0            | Levothyroxine                                |
| HC14 | 22  | no        | no      | 1            | Drospirenone, etinilestradiol,               |
| HC15 | 39  | no        | no      | 0            | no                                           |
| HC16 | 31  | no        | no      | 3            | no                                           |
| HC17 | 46  | no        | no      | 0            | no                                           |

|      |    |     |     |   |                                                |
|------|----|-----|-----|---|------------------------------------------------|
| HC18 | 39 | no  | no  | 0 | Metformnin                                     |
| HC19 | 37 | no  | no  | 0 | no                                             |
| HC20 | 38 | no  | no  | 3 | Metfottmin                                     |
| HC21 | 73 | yes | no  | 0 | no                                             |
| HC22 | 55 | yes | no  | 4 | no                                             |
| HC23 | 39 | no  | no  | 2 | no                                             |
| HC24 | 37 | no  | no  | 0 | Atorvastatin                                   |
| HC25 | 74 | yes | no  | 2 | Losartan, levothyroxine, atorvastatin          |
| HC26 | 44 | no  | no  | 3 | no                                             |
| HC27 | 41 | no  | no  | 1 | no                                             |
| HC28 | 55 | yes | no  | 1 | Anlodipina, Telmisartan                        |
| HC29 | 65 | yes | no  | 2 | Metformin, Sertraline, Etinilestradiol         |
| HC30 | 54 | yes | no  | 2 | Venlafaxine, Etinilestradiol                   |
| HC31 | 48 | yes | no  | 0 | no                                             |
| HC32 | 54 | yes | no  | 1 | Losartan, Hydrochlorothiazide,<br>Atorvastatin |
| HC33 | 54 | yes | no  | 0 | no                                             |
| HC34 | 56 | yes | no  | 3 | no                                             |
| HC35 | 51 | yes | yes | 2 | no                                             |

---

HC: healthy control cases
