# Supplementary material for: Using an Untargeted Metabolomics Approach to Identify Salivary Metabolites in Women with Breast Cancer
Source: MDPI journal article supplement (doi:10.3390/metabo10120506), 2020-12-10
Supplement: s1 [file s1]

**Supplemental Table 4. Retention time and m/z value of the most intense corresponding ion of unidentified compounds statistically overexpressed in patients with breast cancer**

| <b>m/z</b>      | <b>Retention time</b> | <b>fold change (a)</b> | <b>p-value</b> |
|-----------------|-----------------------|------------------------|----------------|
| <b>356.69</b>   | 3.7                   | 5.8                    | 0.02           |
| <b>413.22</b>   | 2.6                   | 2.0                    | 0.03           |
| <b>456.72</b>   | 2.6                   | 3.3                    | 0.002          |
| <b>457.73</b>   | 2.5                   | 2.8                    | 0.02           |
| <b>467.20</b>   | 3.0                   | 2.3                    | 0.02           |
| <b>467.71</b>   | 2.8                   | 3.3                    | 0.01           |
| <b>475.70</b>   | 2.6                   | 3.4                    | 0.002          |
| <b>534.23</b>   | 2.5                   | 1.9                    | 0.04           |
| <b>594.82</b>   | 3.0                   | 2.2                    | 0.04           |
| <b>602.32</b>   | 2.7                   | 3.5                    | 0.04           |
| <b>602.96</b>   | 3.1                   | 2.5                    | 0.01           |
| <b>614.32</b>   | 2.6                   | 2.4                    | 0.01           |
| <b>614.82</b>   | 2.8                   | 3.0                    | 0.04           |
| <b>661.34</b>   | 3.0                   | 2.7                    | 0.04           |
| <b>749.4</b>    | 3.0                   | 2.3                    | 0.02           |
| <b>818.47</b>   | 2.4                   | 3.2                    | 0.04           |
| <b>875.49</b>   | 2.5                   | 2.8                    | 0.04           |
| <b>1,015.04</b> | 3.1                   | 2.4                    | 0.03           |

HPLC : high performance liquid chromatography; (a) Increasing fold change between the group of patients and of controls
