# Supplementary material for: Using an Untargeted Metabolomics Approach to Identify Salivary Metabolites in Women with Breast Cancer
Source: MDPI journal article supplement (doi:10.3390/metabo10120506), 2020-12-10
Supplement: s1 [file s1]

**Supplemental Table 2. Salivary metabolites previously reported with their corresponding molecular weight and m/z of their parent ion.**

| <b>Metabolites</b>              | <b>Molecular Weight</b> | <b>m/z (M+H)</b> |
|---------------------------------|-------------------------|------------------|
| 2-Hydroxypentanoate             | 117.124                 | 118.12           |
| Dodecanoic acid                 | 200                     | 201.37           |
| N-Acetylneuraminate             | 309                     | 310.26           |
| N-ε-Acetyllysine                | 188.224                 | 189.23           |
| 1,3-Diaminopropane              | 74.124                  | 75.13            |
| 2-hydroxy-4 methylvaleric acid  | 132.159                 | 133.16           |
| 2-Hydroxy-4-methylpentanoate    | 131.151                 | 132.15           |
| 2-Hydroxybutanedioate           | 132.071                 | 133.07           |
| 2-Hydroxybutyric acid           | 104.104                 | 105.10           |
| 2-Hydroxyvaleric acid           | 118.131                 | 119.13           |
| 2-Ketobutyric acid              | 102.088                 | 103.09           |
| 3-Hydroxybutyric acid           | 104.104                 | 105.10           |
| 4- Methylbenzoate               | 135.142                 | 136.14           |
| 4-Hydroxyphenylpyruvic acid     | 180.157                 | 181.16           |
| 4-methoxyphenylacetic acid      | 166.173                 | 167.17           |
| 4-Trimethylammoniobutanoic acid | 146.207                 | 147.21           |
| 5-Aminolevulinic acid           | 131.129                 | 132.13           |
| 6,N6,N6-Trimethyl-L-lysine      | 188.267                 | 189.27           |
| 7-Methylguanine                 | 165.152                 | 166.15           |
| Adenosine                       | 267.241                 | 268,24           |
| Alanyl-Alanine                  | 160.171                 | 161.17           |
| alpha-Ketoisovaleric acid       | 116.115                 | 117.12           |
| Arachidic acid                  | 312.530                 | 313.53           |
| arginine                        | 174.201                 | 175.20           |
| Aspartic acid                   | 133.102                 | 133.10           |
| beta-alanine                    | 89.093                  | 90.09            |
| betaine                         | 117.146                 | 118.15           |
| Butyric acid                    | 88.105                  | 89.11            |
| c-aminobutyric acid             | 103.119                 | 104.12           |

|                            |         |        |
|----------------------------|---------|--------|
| cadaverine                 | 102.178 | 103.18 |
| Caproic acid               | 116.158 | 117.16 |
| choline                    | 104.170 | 105.17 |
| cis-Aconitate              | 174.108 | 175.11 |
| Citric acid                | 192.123 | 193.12 |
| citrulline                 | 175.185 | 176.19 |
| Cystine                    | 240.3   | 241.30 |
| Cytosine                   | 111.102 | 112.10 |
| D- alpha-aminobutyric acid | 103.119 | 104.12 |
| Desaminotyrosine           | 166.173 | 167.17 |
| diaminopropane             | 74.124  | 75.13  |
| Diglycine                  | 132.119 | 133.12 |
| Ethanolamine               | 61.083  | 62.08  |
| Ethanolamine Phosphate     | 141.063 | 142.06 |
| formic acid                | 46.025  | 47.03  |
| glutamic acid              | 147.129 | 148.13 |
| glutamine                  | 146.144 | 147.14 |
| Glutathione                | 307.323 | 308.32 |
| glycine                    | 75.066  | 76.07  |
| glycolic acid              | 76.051  | 77.05  |
| Glycyl-L-leucine           | 188.22  | 189.22 |
| Guanine                    | 151.126 | 152.13 |
| Guanosine                  | 283.240 | 284.24 |
| heptanoic acid             | 130.184 | 131.18 |
| histidine                  | 155.154 | 156.15 |
| homocysteine               | 135.185 | 136.19 |
| Hydrocinnamic acid         | 150.174 | 151.17 |
| Hydroxylysine              | 162.187 | 163.19 |
| Hypotaurine                | 109.147 | 110.15 |
| Hypoxanthine               | 136.111 | 137.11 |
| Inosine                    | 268.226 | 269.23 |
| isoleucine                 | 131.172 | 132.17 |
| Isopropanolamine           | 75.110  | 76.11  |

|                            |         |        |
|----------------------------|---------|--------|
| L- alpha-aminobutyric acid | 103.119 | 104.12 |
| L-Alanine                  | 89.093  | 90.09  |
| L-carnitine                | 161.198 | 162.20 |
| lactic acid                | 90.077  | 91.08  |
| leucine                    | 131.172 | 132.17 |
| Leucinic acid              | 132.157 | 133.16 |
| lysine                     | 146.187 | 147.19 |
| LysoPC (16:0)              | 495.630 | 496.63 |
| LysoPC (18:1)              | 521.676 | 522.68 |
| LysoPC (22:6)              | 567.694 | 568.69 |
| LysoPE<br>(18:2/0:0)       | 477.571 | 478.57 |
| methionine                 | 149.211 | 150.21 |
| Myristic acid              | 228.370 | 229.37 |
| N-Acetyl-L-phenylalanine   | 207.225 | 208.23 |
| N-Acetylornithine          | 174.197 | 175.20 |
| <i>N,N</i> -Dimethylglycin | 103.121 | 104.12 |
| N1 –acetylspermidine       | 187.282 | 188.28 |
| N1-acetyl-spermine         | 244.376 | 245,38 |
| N1-acetylputrescine        | 130.188 | 131.19 |
| <i>N6-Acetyl-L-lysine</i>  | 188.224 | 189.22 |
| N8-Acetylspermidine        | 187.282 | 188.28 |
| Nicotinic acid             | 123.109 | 124.11 |
| Octanoate                  | 143.206 | 144.21 |
| octanoic acid              | 256.424 | 257.42 |
| ornithine                  | 132.161 | 133.16 |
| p-hydroxyphenylacetic acid | 152.147 | 153.15 |
| palmitic amid              | 284.477 | 285.48 |
| phenylalanine              | 165.189 | 166.19 |
| Phenyllactic acid          | 166.173 | 167.17 |
| Phosphoserine              | 185.072 | 186.07 |
| Pipecolic acid             | 129.157 | 130.16 |
| piperidine                 | 85.147  | 86.15  |

|                                      |         |        |
|--------------------------------------|---------|--------|
| proline                              | 115.130 | 116.13 |
| putrescine                           | 88.151  | 89.15  |
| Pyrroline                            |         |        |
| hydroxycarboxylic acid               | 129.114 | 130.11 |
| Ribose 5-phosphate                   | 230.110 | 231.11 |
| saccharic acid                       |         |        |
| derivative (N-Acetylneuraminic acid) | 210.138 | 211.14 |
| serine                               | 105.092 | 106.09 |
| spermidine                           | 145.245 | 146.25 |
| spermine                             | 202.340 | 203.34 |
| sphingolipid                         |         |        |
| (phytosphingosine)                   | 317.514 | 318.51 |
| taurine                              | 125.147 | 126.15 |
| terephthalic acid                    | 166.130 | 167.13 |
| threonine                            | 119.119 | 120.12 |
| Trimethylamine                       | 59.110  | 60.11  |
| Tryptophan                           | 204.225 | 205.23 |
| tyrosine                             | 181.188 | 182.19 |
| urea                                 | 60.055  | 61.06  |
| Ureidosuccinic acid                  | 176.127 | 177.13 |
| uric acid                            | 168.110 | 169.11 |
| valine                               | 117.146 | 118.15 |
