# Supplementary material for: Using an Untargeted Metabolomics Approach to Identify Salivary Metabolites in Women with Breast Cancer
Source: MDPI journal article supplement (doi:10.3390/metabo10120506), 2020-12-10

Supplemental Fig 1: Overlay of the LC/MS profiles (Total Ions Chromatograms) for BC patients (in dot lines) and healthy controls (in plain lines).

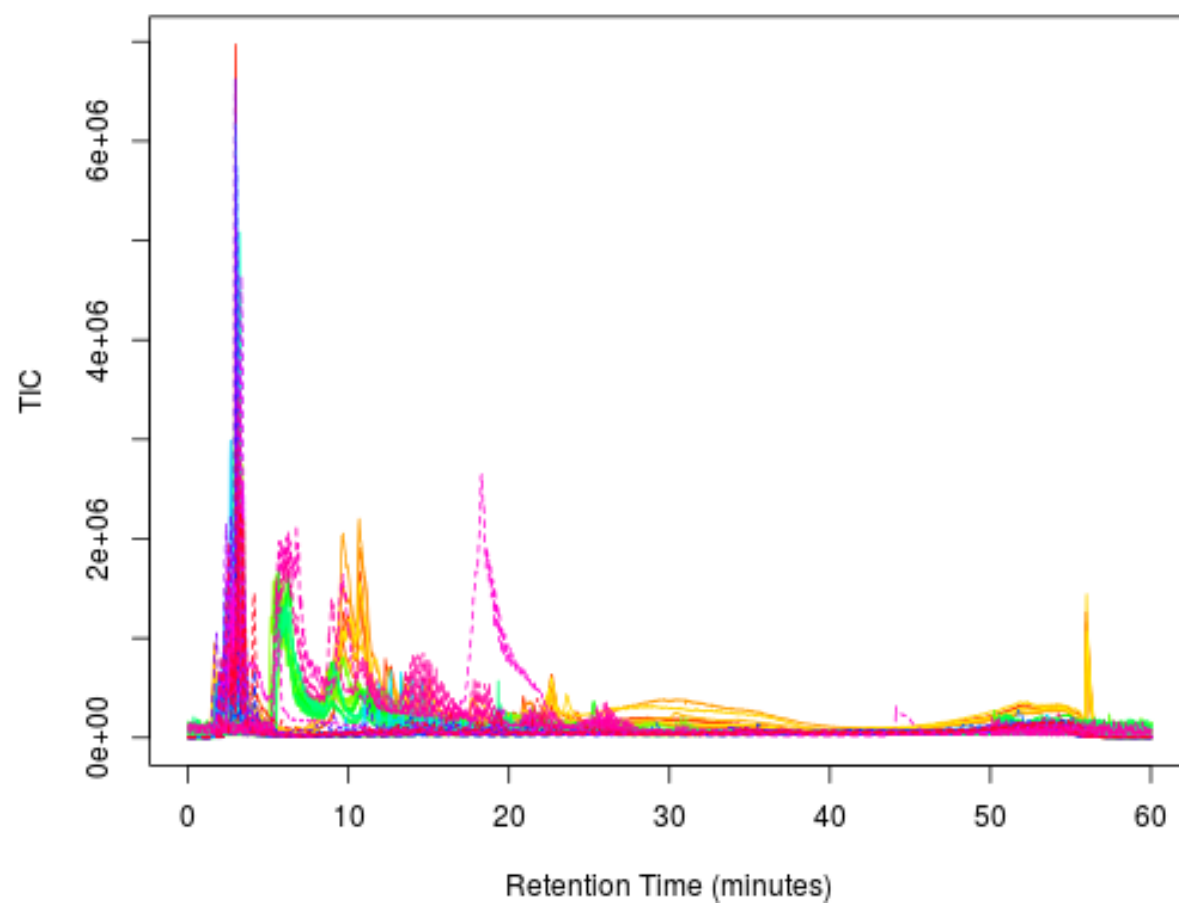

Supplement: s1 [file s1]
