# Supplementary material for: Using an Untargeted Metabolomics Approach to Identify Salivary Metabolites in Women with Breast Cancer
Source: MDPI journal article supplement (doi:10.3390/metabo10120506), 2020-12-10
Supplement: s1 [file s1]

**Supplement Table 3. List of medications used by subjects**

| <b>Medications</b>  | <b>Molecular Mass</b> | <b>m/z DA</b> | <b>Number of cases using</b> | <b>Number of controls using</b> |
|---------------------|-----------------------|---------------|------------------------------|---------------------------------|
| Losartan            | 422.91 g/mol          | 423.91        | 2                            | 2                               |
| Metformin           | 129.16364 g/mol       | 130.16        | 1                            | 2                               |
| Indapamide          | 365.835 g/mol         | 366.83        | 1                            | 0                               |
| Mebeverine          | 429.6 g/mol           | 430.6         | 0                            | 1                               |
| Sertraline          | 306.229 g/mol         | 307.22        | 0                            | 1                               |
| Clonazepam          | 315.715 g mol         | 316.71        | 0                            | 0                               |
| Valsartan           | 435.519 g/mol         | 436.51        | 0                            | 0                               |
| Levothyroxine       | 776.874 g/mol         | 777.87        | 2                            | 3                               |
| Amlodipine          | 408.879 g/mol         | 409.87        | 2                            | 1                               |
| Hydrochlorothiazide | 297.74 g/mol          | 298.74        | 1                            | 1                               |
| Captopril           | 217.29 g/mol          | 218.29        | 1                            | 0                               |
| Atenolol            | 266.336 g/mo          | 267.33        | 3                            | 0                               |
| Drospirenone        | 366.493 g/mol         | 367.49        | 0                            | 1                               |
| Omeprazole          | 345.42 g/mol          | 346.42        | 0                            | 2                               |
| Venlafaxine         | 277.402 g/mol         | 278.40        | 0                            | 1                               |
| Telmisartan         | 514.617 g/mol         | 515.61        | 0                            | 1                               |
| Ethinylestradiol    | 296.403 g/mol         | 297.40        | 0                            | 3                               |
